# Supplementary material for: The Genotypic Imperative: Unraveling Disease-Permittivity in Functional Modules of Complex Diseases
Source: MDPI journal article supplement (doi:10.3390/math11244916), 2023-12-11
Supplement: s1 [file s1]

Archive with 1 entries (1 files):
- mathematics-2722267-Supplementary.pdf
